# Supplementary material
Source: publisher figshare collection journal article supplement (https://sage.figshare.com/ndownloader/files/19037231)
Supplement: Supplementary file 1 [file 19037231]

## **Methodology File**

All materials and data for the present paper are available on the Open Science Framework:

Anonymous reviewer link: <https://bit.ly/2mpJo6m>

The link which will be made public once the paper is published: <https://osf.io/34jhs>

These links are both provided in the manuscript as well.
